# Supplementary material for: Study on the Alternative Solvent of Methylbenzene in the Total Acid Number Titration of Current Jet Fuels
Source: PubMed Central journal article supplement — ACS Omega. 2022 Feb 22;7(9):7957–62. doi: 10.1021/acsomega.1c07015 (PMC8908365; doi:10.1021/acsomega.1c07015), 2022-02-22
Supplement: ao1c07015_si_001.pdf [file ao1c07015_si_001.pdf]

## Supporting Information

### **Study on the Alternative Solvent of Methylbenzene in Total Acid Number Titration of Current Jet Fuel**

Teng Chen,<sup>\*,†,‡</sup> Jingtuan Hao,<sup>†</sup> Hui Yan,<sup>§</sup> Jun Ma,<sup>\*,†</sup> Yuanbao Sun,<sup>†</sup> Xin Xu,<sup>†</sup> Liping Tong,<sup>†</sup> and Yiwei Fei<sup>\*,†</sup>

<sup>†</sup>*Department of Aviation Oil and Material, Air Force Logistics Academy, Xuzhou 221000, China*

<sup>‡</sup>*Key Lab of Mesoscopic Chemistry, School of Chemistry and Chemical Engineering, Nanjing University, Nanjing 210023, China*

<sup>§</sup>*College of Chemistry and Materials Science, Huaibei Normal University, Huaibei 235000, China*

\*Corresponding author. E-mail: [chentyp@nju.edu.cn](mailto:chentyp@nju.edu.cn); [manudt@163.com](mailto:manudt@163.com); [yiweifei50@163.com](mailto:yiweifei50@163.com)

## Supplementary Tables

**Table S1.** Titration results with the mixed solution of methylbenzene, isopropanol and water ( $V_{\text{methylbenzene}}:V_{\text{isopropanol}}:V_{\text{water}} = 100:99:1$ ) as titration solvent.

| Parameter                                         | Jet fuel sample |       |       |       |       | Blank sample |      |      |
|---------------------------------------------------|-----------------|-------|-------|-------|-------|--------------|------|------|
|                                                   | 1               | 2     | 3     | 4     | 5     | 1            | 2    | 3    |
| Quality of jet fuel/g                             | 100.0           | 100.0 | 100.0 | 100.0 | 100.0 | -            | -    | -    |
| Volume of titration solvent /mL                   | 100             | 100   | 100   | 100   | 100   | 100          | 100  | 100  |
| Flow rate of N <sub>2</sub> /mL min <sup>-1</sup> | 700             | 700   | 700   | 700   | 700   | 700          | 700  | 700  |
| Volume of indicator/mL                            | 0.1             | 0.1   | 0.1   | 0.1   | 0.1   | 0.1          | 0.1  | 0.1  |
| Volume of consumed KOH solution /mL               | 0.60            | 0.64  | 0.65  | 0.62  | 0.63  | 0.24         | 0.22 | 0.23 |
| TAN/ $\mu\text{g KOH g}^{-1}$                     | 2.5             | 2.7   | 2.8   | 2.6   | 2.8   | -            | -    | -    |

**Table S2.** Titration results with the mixed solution of absolute ethanol and water ( $V_{\text{absolute ethanol}}:V_{\text{water}} = 99:1$ ) as titration solvent.

| Parameter                                         | Jet fuel sample |      |      |      |      | Blank sample |      |      |
|---------------------------------------------------|-----------------|------|------|------|------|--------------|------|------|
|                                                   | 1               | 2    | 3    | 4    | 5    | 1            | 2    | 3    |
| Quality of jet fuel/g                             | 100             | 100  | 100  | 100  | 100  | -            | -    | -    |
| Volume of titration solvent /mL                   | 100             | 100  | 100  | 100  | 100  | 100          | 100  | 100  |
| Flow rate of N <sub>2</sub> /mL min <sup>-1</sup> | 700             | 700  | 700  | 700  | 700  | 700          | 700  | 700  |
| Volume of indicator/mL                            | 0.1             | 0.1  | 0.1  | 0.1  | 0.1  | 0.1          | 0.1  | 0.1  |
| Volume of consumed KOH solution /mL               | 0.53            | 0.52 | 0.52 | 0.54 | 0.54 | 0.14         | 0.14 | 0.14 |
| TAN/ $\mu\text{g KOH g}^{-1}$                     | 2.6             | 2.5  | 2.5  | 2.7  | 2.7  | -            | -    | -    |
